# Supplementary material for: Glycolysis and glutaminolysis cooperatively control T cell function by limiting metabolite supply to N-glycosylation
Source: eLife journal article supplement (doi:10.7554/elife.21330), 2017-01-06
Supplement: supp [file elife-21330-supp-v1.zip]

Archive with 7 entries (7 files):
- elife_poa_e21330_Figure_1_figure_supplement_1.pdf
- elife_poa_e21330_Figure_1_figure_supplement_2.pdf
- elife_poa_e21330_Figure_6_figure_supplement_1.pdf
- elife_poa_e21330_Figure_5_figure_supplement_1.pdf
- elife_poa_e21330_Figure_2_figure_supplement_1.pdf
- elife_poa_e21330_Figure_4_figure_supplement_1.pdf
- elife_poa_e21330_Figure_3_figure_supplement_1.pdf
