# Supplementary figures and images for: Glycolysis and glutaminolysis cooperatively control T cell function by limiting metabolite supply to N-glycosylation
Source: eLife journal article supplement (doi:10.7554/elife.21330), 2017-01-06

Figure 1 – figure supplement 1

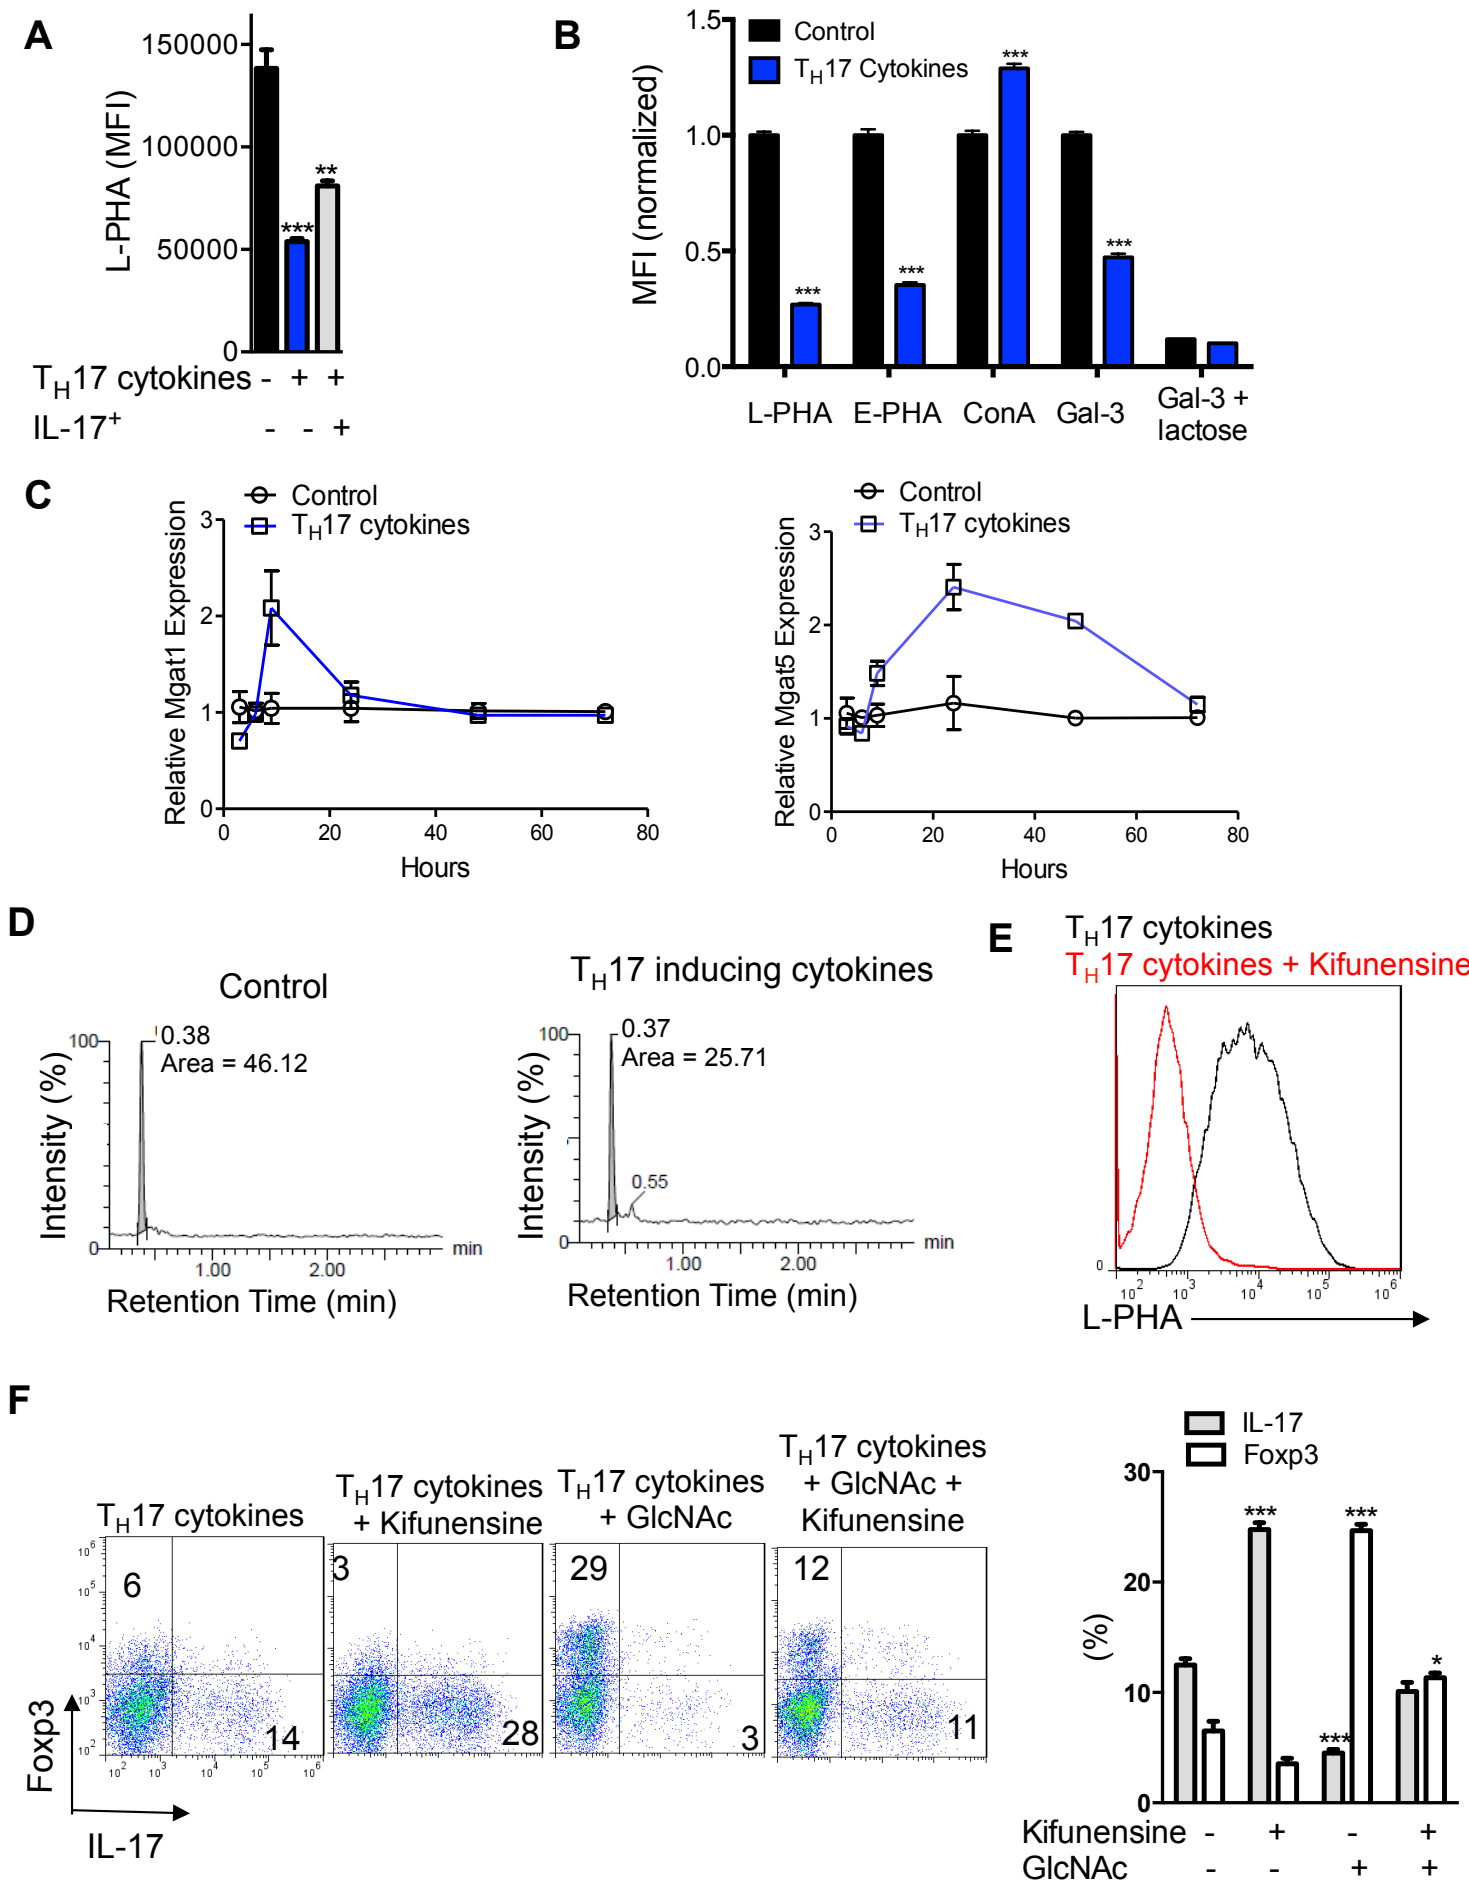

Supplement: supp [file elife-21330-supp-v1.zip › elife_poa_e21330_Figure_1_figure_supplement_1.pdf]

Figure 1 – figure supplement 2

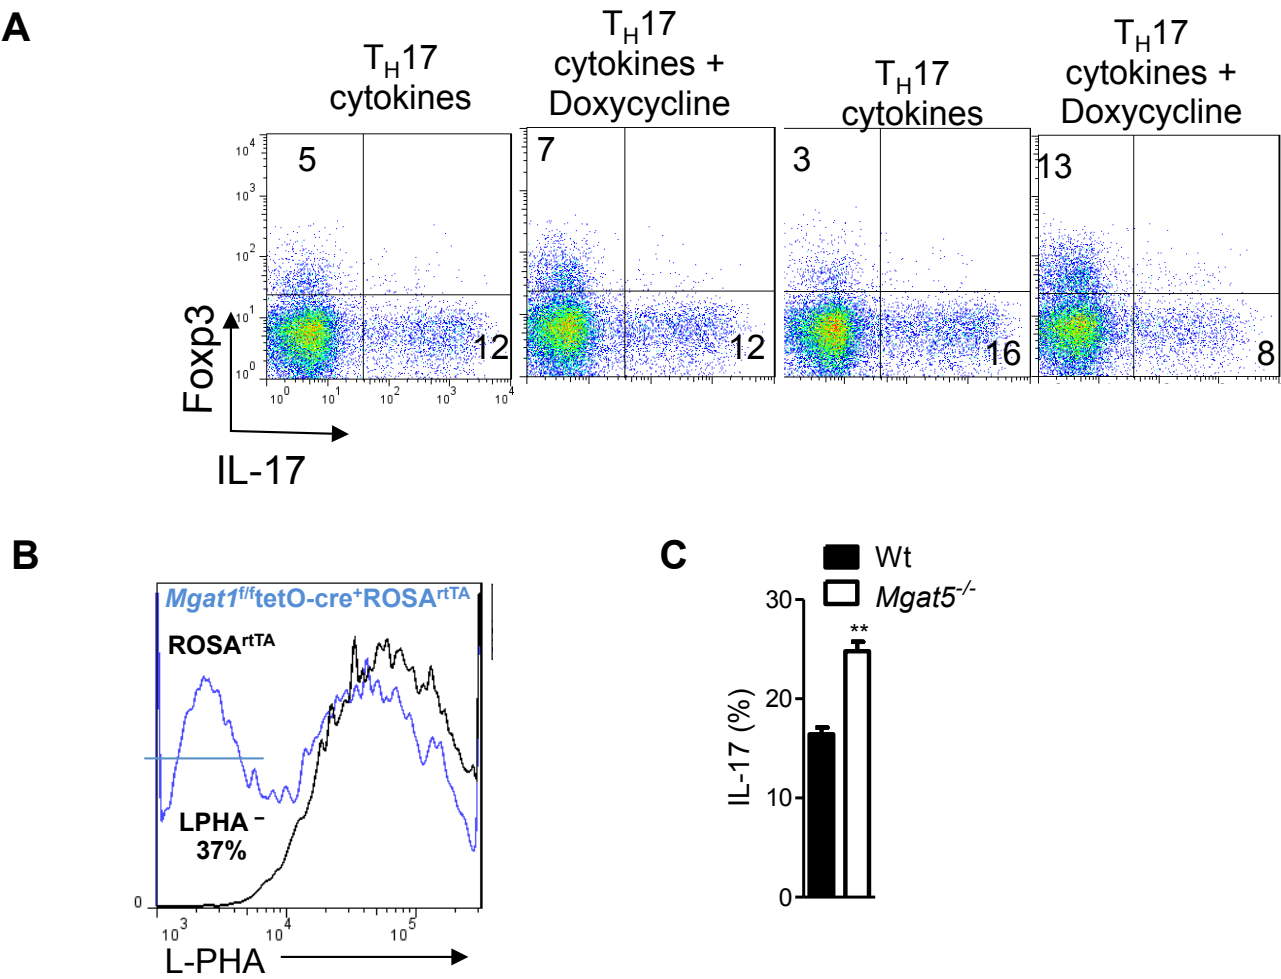

Supplement: supp [file elife-21330-supp-v1.zip › elife_poa_e21330_Figure_1_figure_supplement_2.pdf]

Figure 6 – figure supplement 1

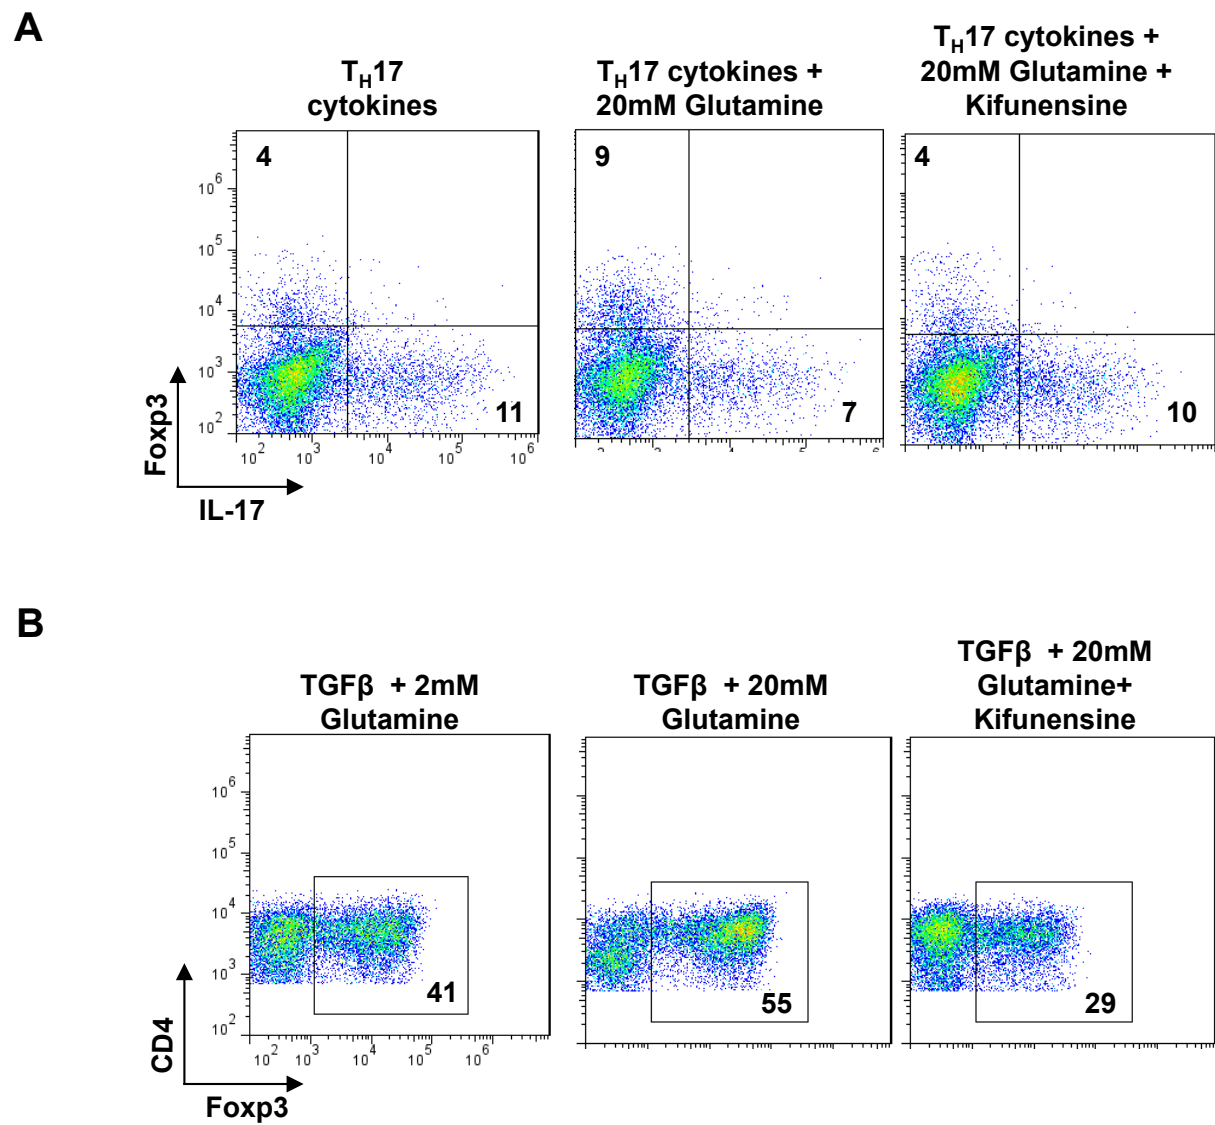

Supplement: supp [file elife-21330-supp-v1.zip › elife_poa_e21330_Figure_6_figure_supplement_1.pdf]

Figure 5 – figure supplement 1

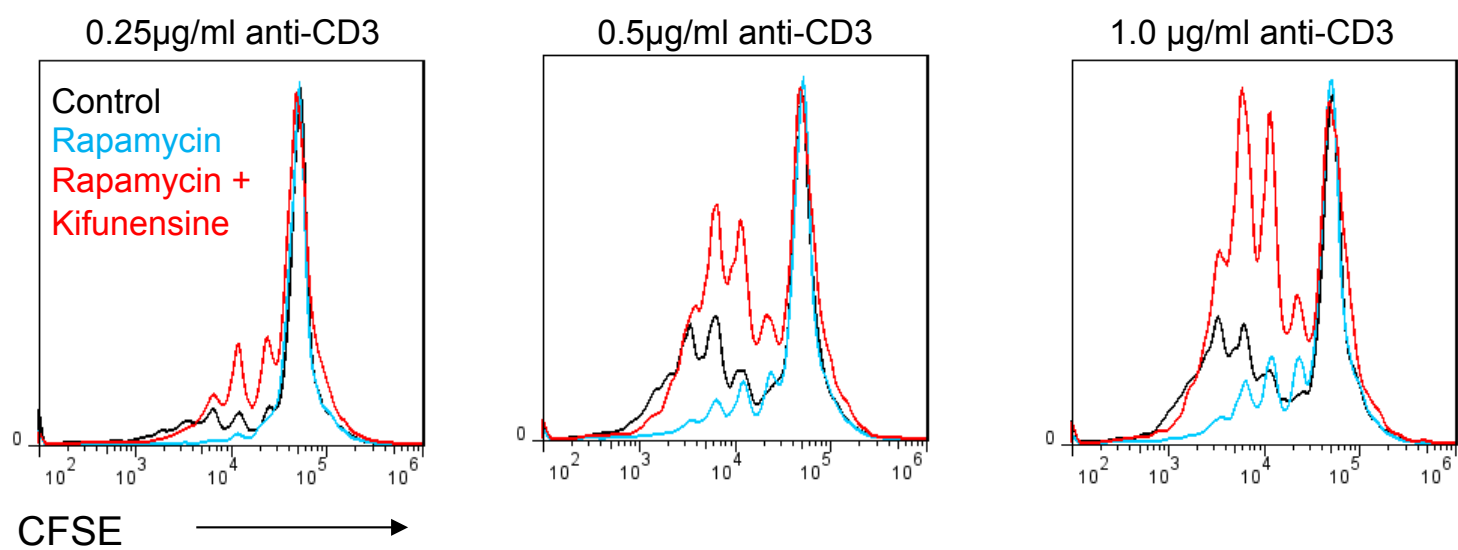

Supplement: supp [file elife-21330-supp-v1.zip › elife_poa_e21330_Figure_5_figure_supplement_1.pdf]

Figure 2 – figure supplement 1

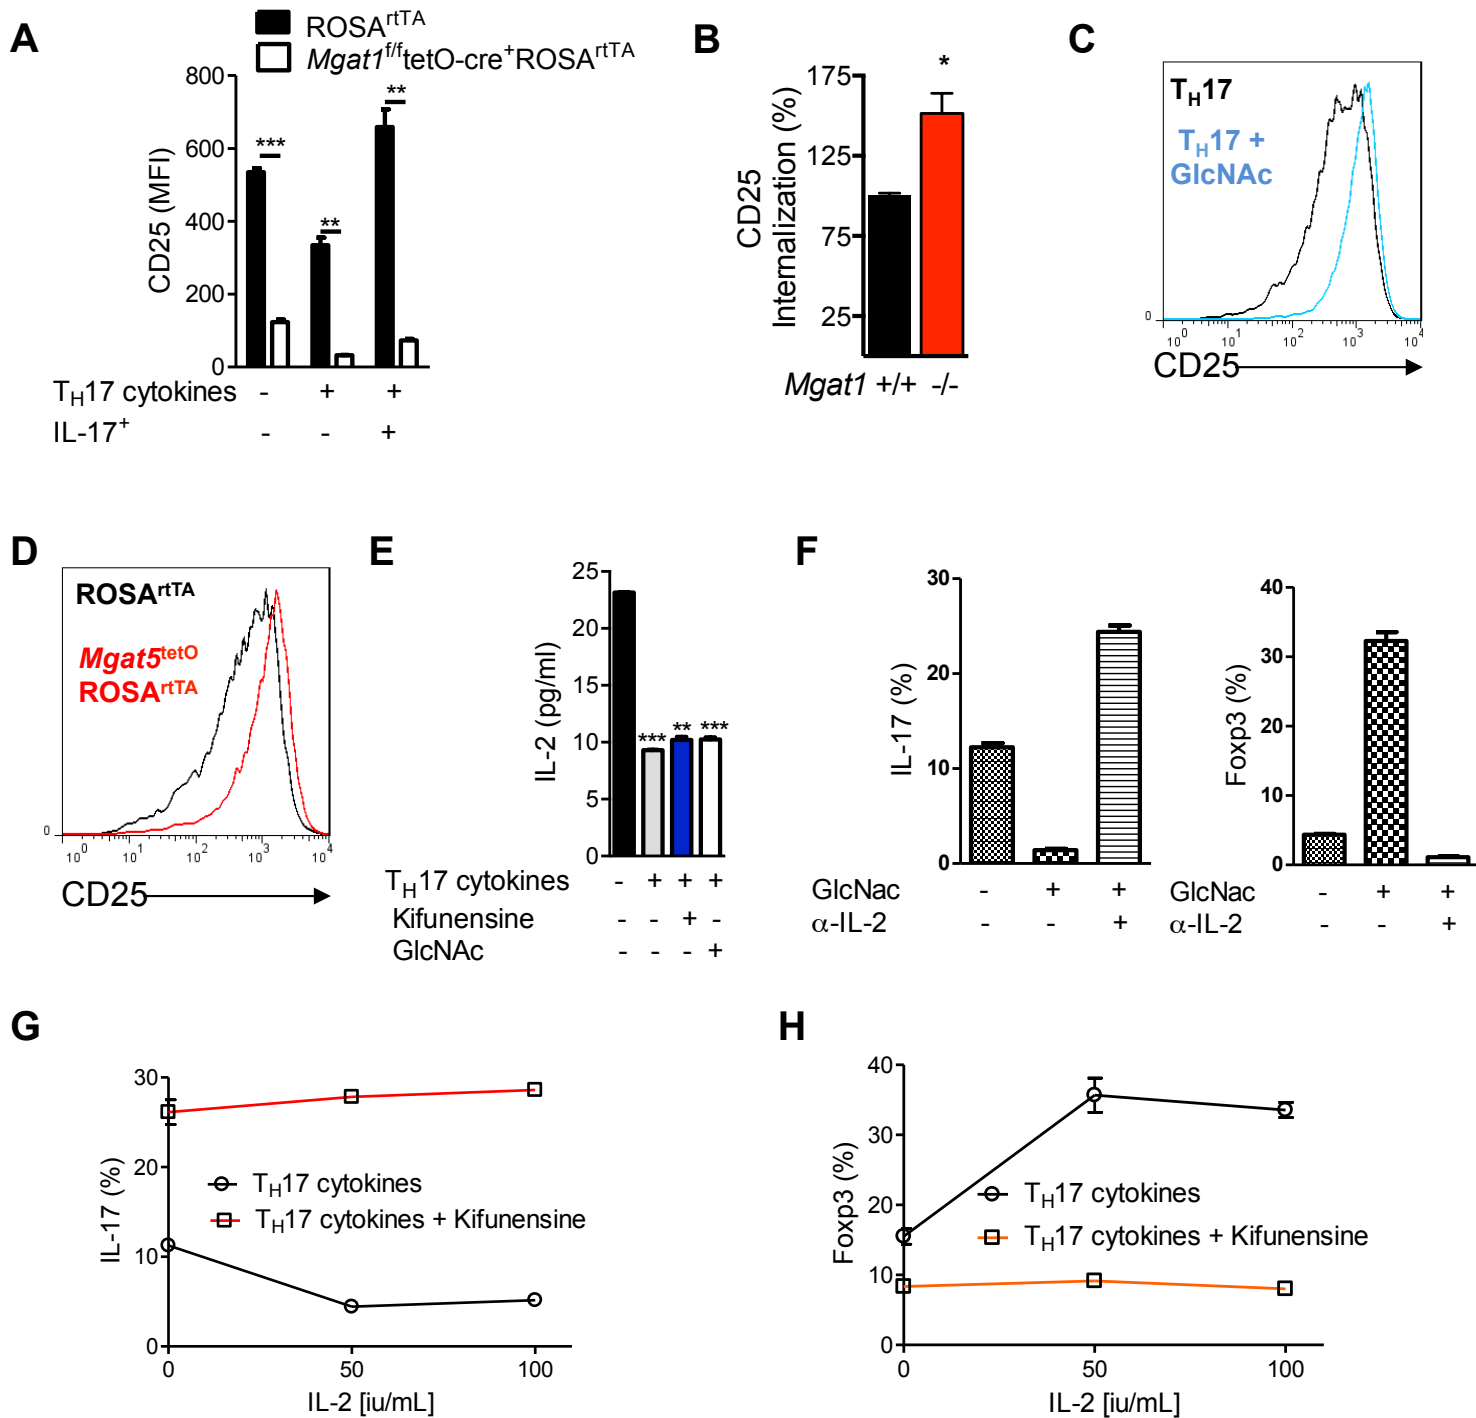

Supplement: supp [file elife-21330-supp-v1.zip › elife_poa_e21330_Figure_2_figure_supplement_1.pdf]

Figure 4 – figure supplement 1

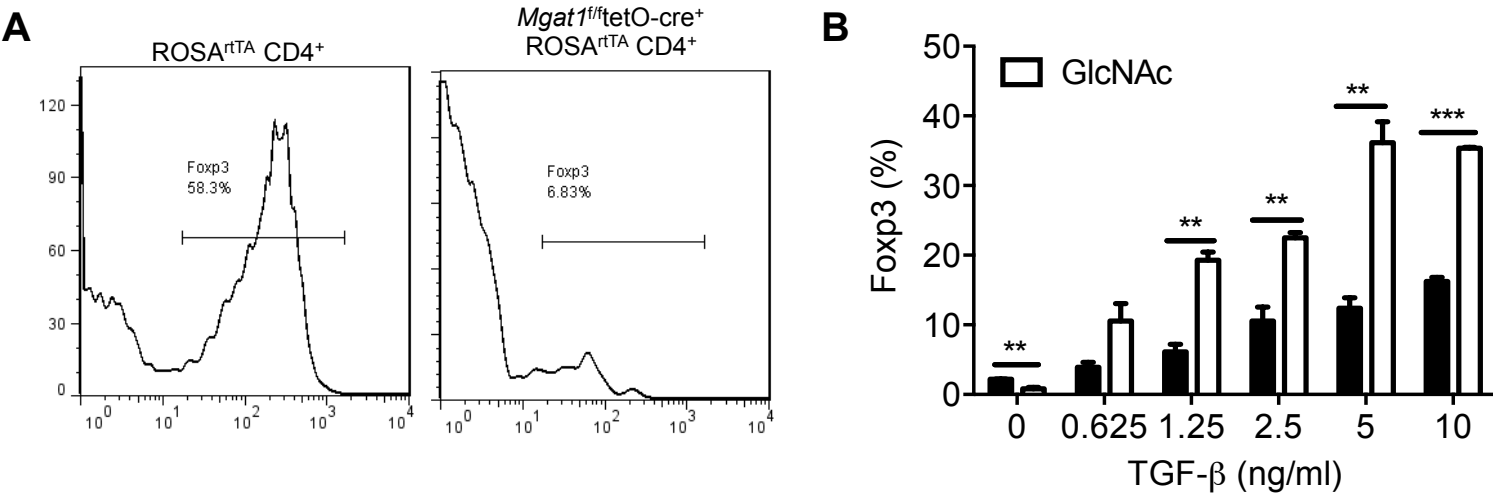

Supplement: supp [file elife-21330-supp-v1.zip › elife_poa_e21330_Figure_4_figure_supplement_1.pdf]

Figure 3 – figure supplement 1

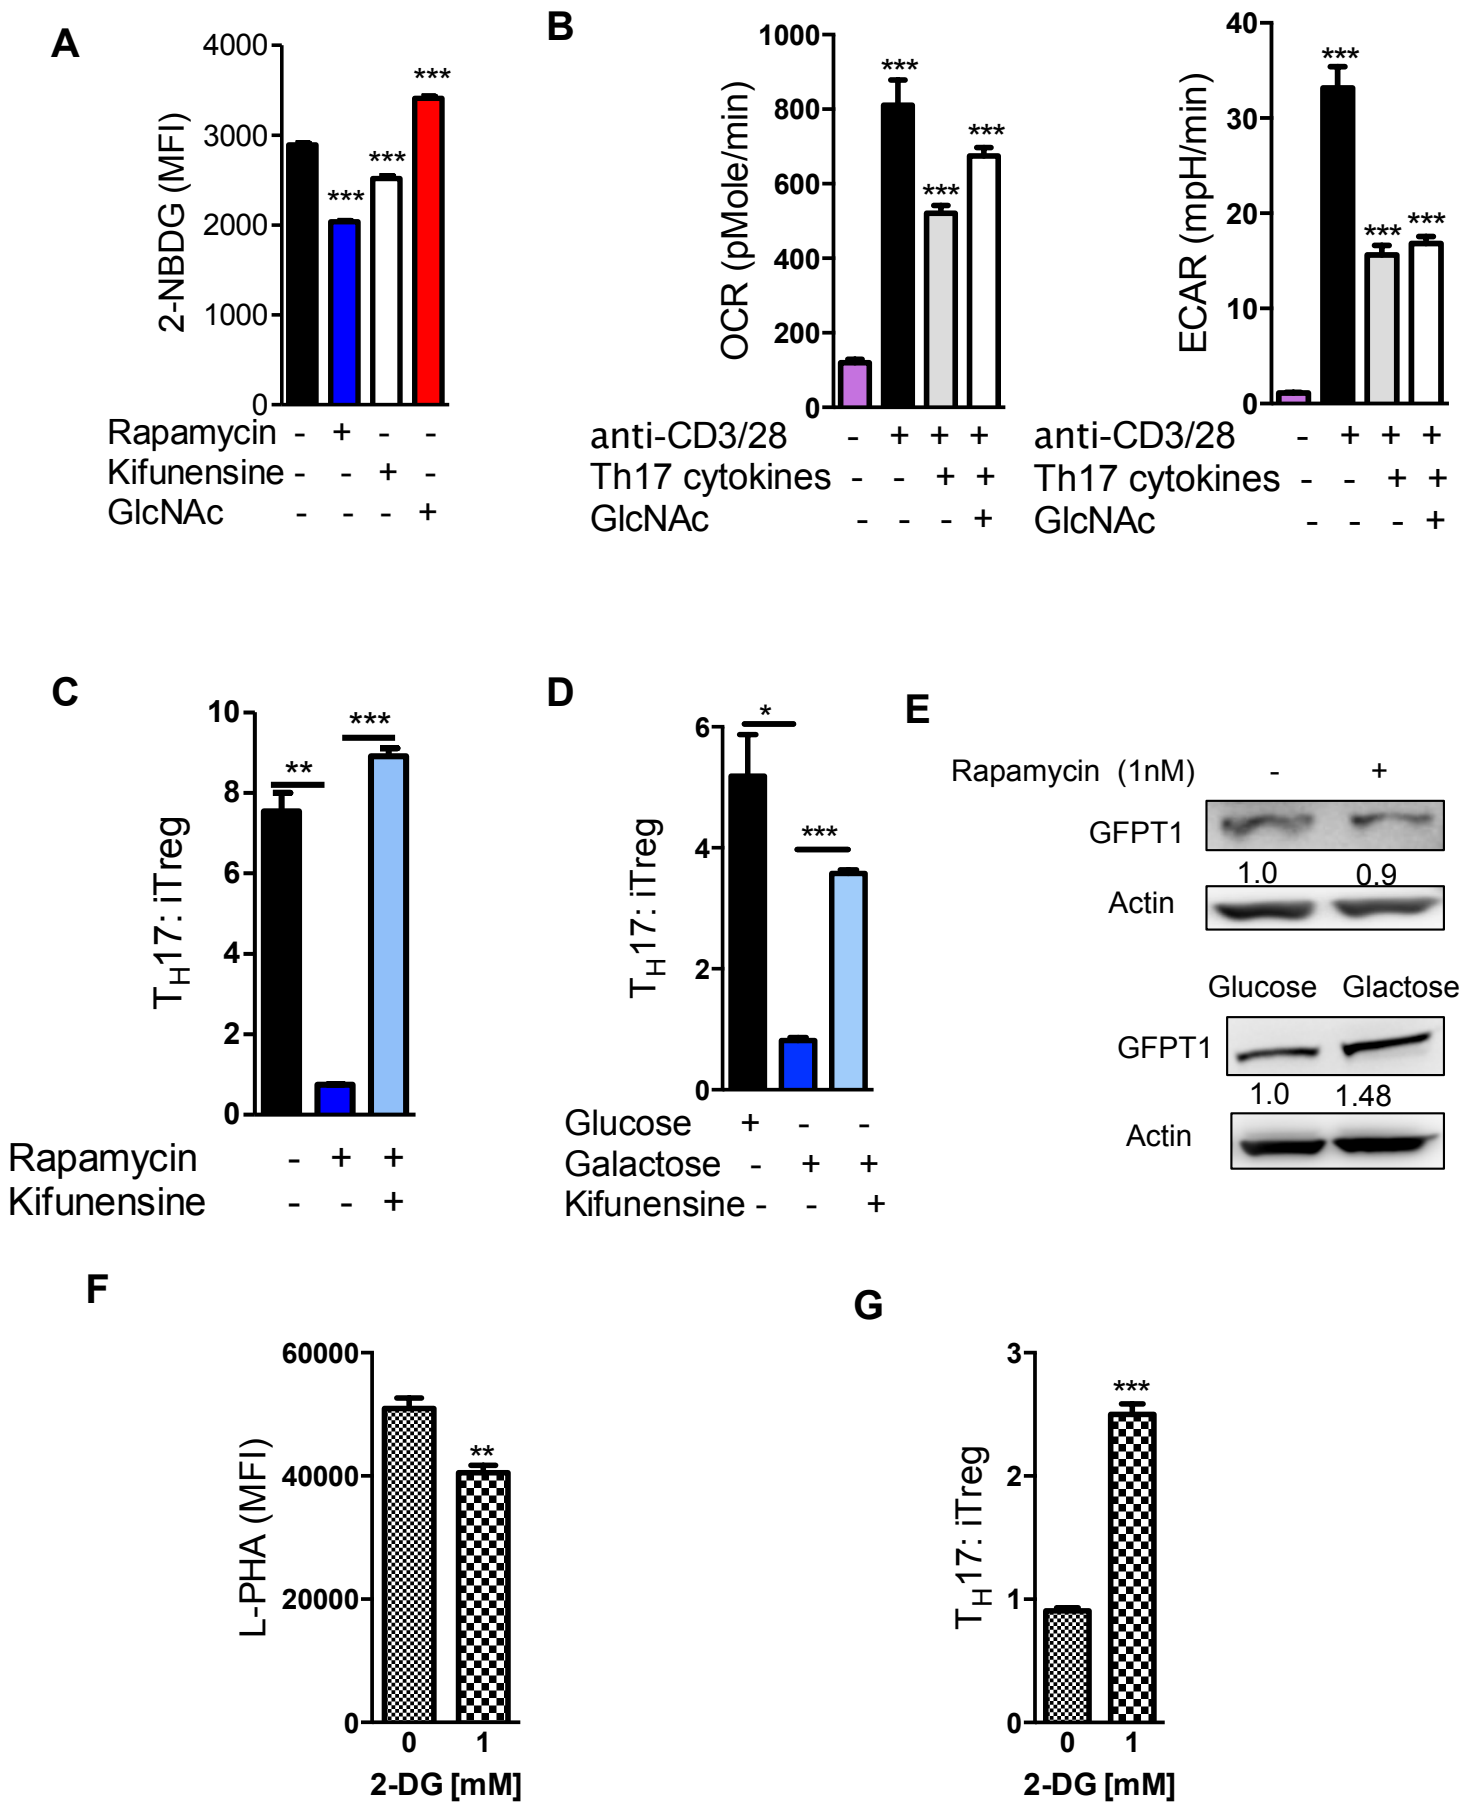

Supplement: supp [file elife-21330-supp-v1.zip › elife_poa_e21330_Figure_3_figure_supplement_1.pdf]
